# Supplementary material for: High-intensity training enhances executive function in children in a randomized, placebo-controlled trial
Source: PubMed Central journal article supplement (PMC5566451; doi:10.7554/elife.25062), 2017-08-22

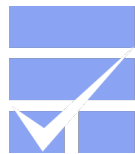

# CONSORT

TRANSPARENT REPORTING of TRIALS

## CONSORT 2010 Flow Diagram

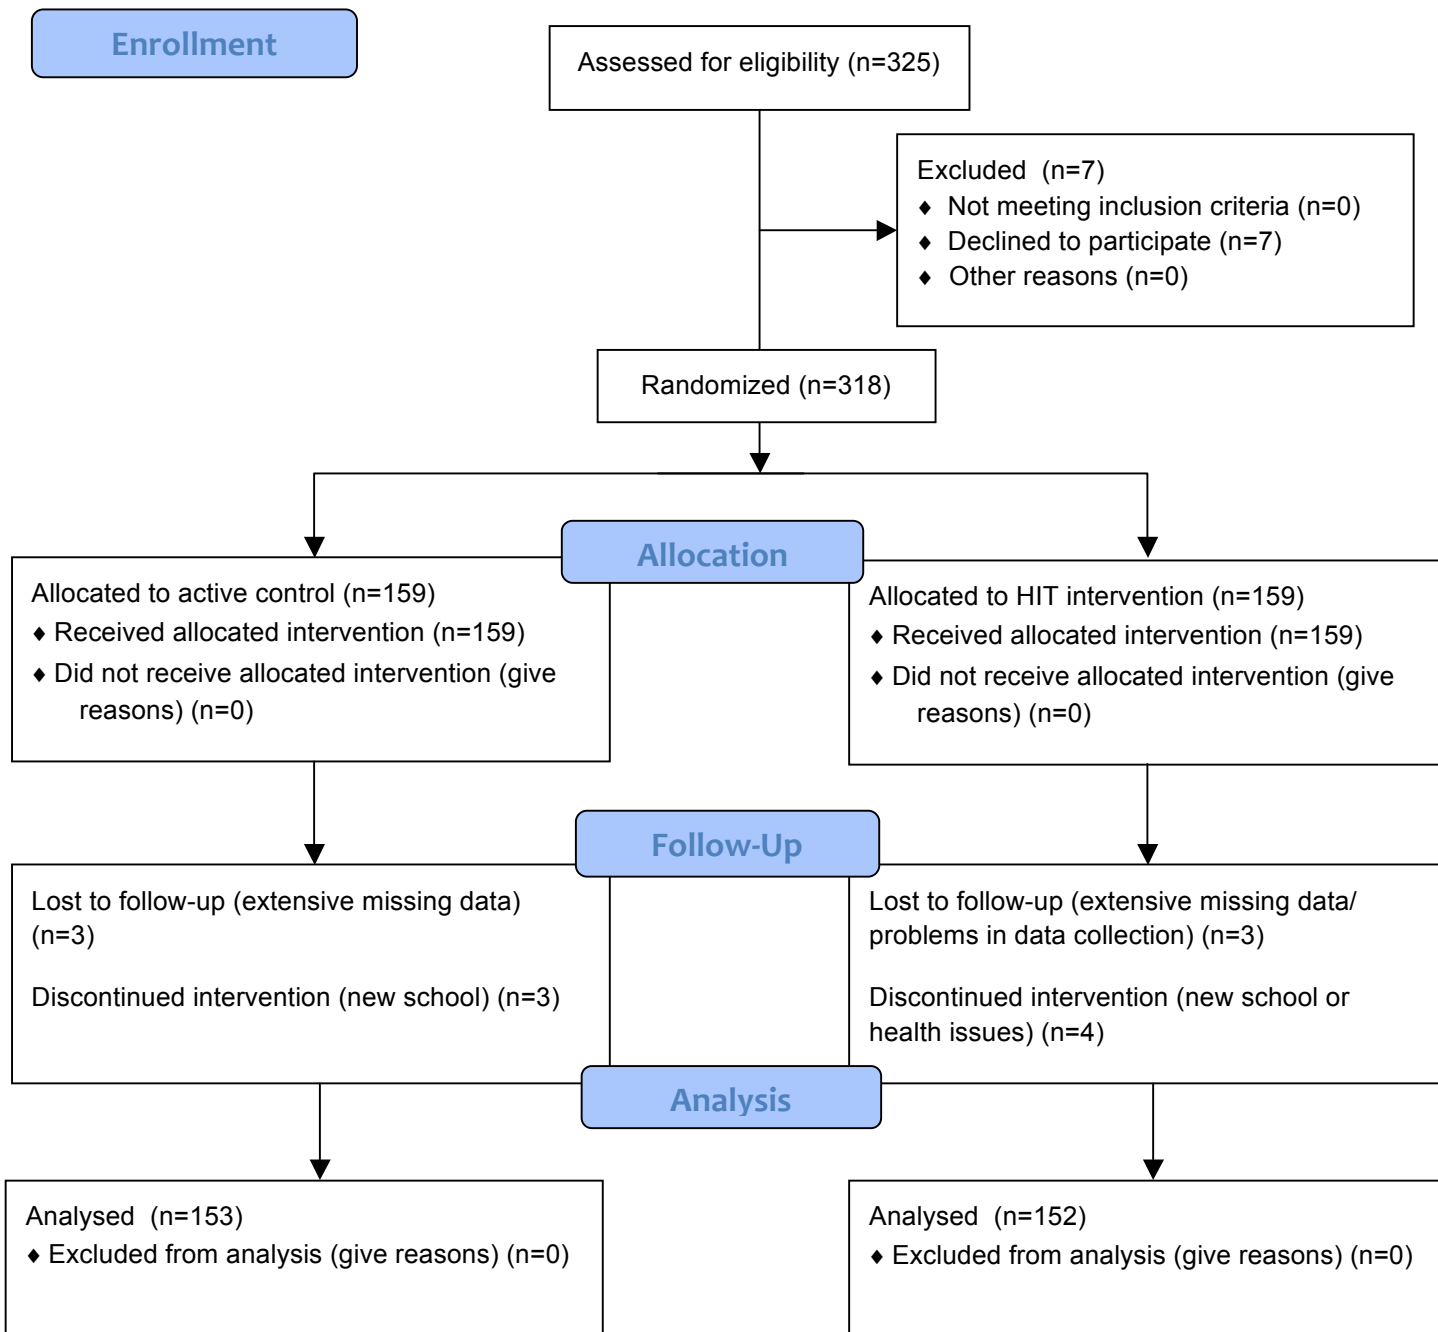

Supplement: elife-25062-repstand1.pdf [file elife-25062-repstand1.pdf]
